# Supplementary material for: Phase transformation of TiO2 nanobelts and TiO2(B)/anatase interface heterostructure nanobelts with enhanced photocatalytic activity
Source: Royal Society of Chemistry journal article supplement (doi:10.1039/c1ce05638g), 2011-01-01
Supplement: c1ce05638g.pdf [file c1ce05638g.pdf]

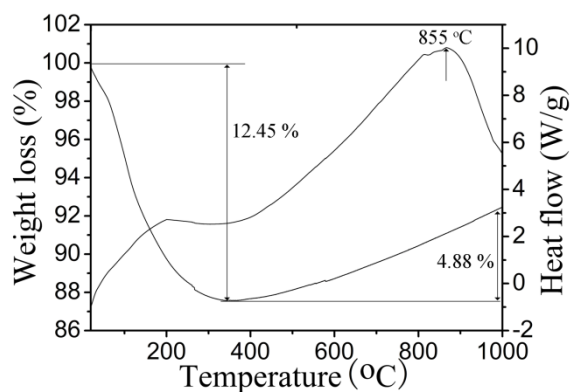

Figure S1 TG–DSC curves of  $\text{H}_2\text{Ti}_3\text{O}_7$  recorded over the temperature range from ambient to 1000 °C at a heating rate of 5 °C /min in air atmosphere.

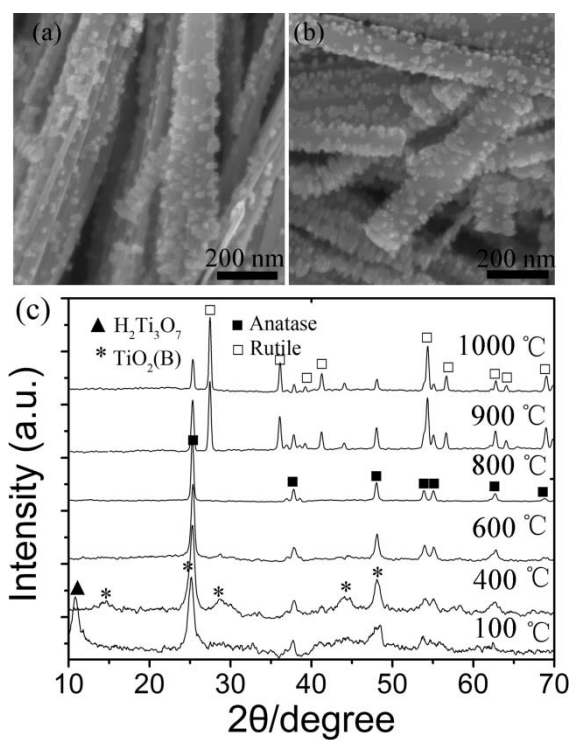

Figure S2 (a, b) typical SEM images  $\text{H}_2\text{Ti}_3\text{O}_7$  nanobelts obtained by 0.02 M  $\text{H}_2\text{SO}_4$  hydrothermal treatment at 100 °C for 12 h, (c) XRD results of the acid-corroded  $\text{TiO}_2$  nanobelts calcined at the different temperatures.
